# Supplementary material for: Classification Scheme of Heating Risk during MRI Scans on Patients with Orthopaedic Prostheses
Source: MDPI journal article supplement (doi:10.3390/diagnostics12081873), 2022-08-02
Supplement: s1 [file s1]

**CLASSIFICATION SCHEME OF HEATING RISK DURING MRI SCANS  
ON PATIENTS WITH ORTHOPAEDIC PROSTHESES**

**SUPPLEMENTARY MATERIALS**

**Table S1.** Features of the Register of the Orthopaedic Prosthetic Implants (RIPO) database.

| <b>Implant type</b> | <b>Data collection Time range</b> | <b>Included implants</b>                                                                         | <b>Excluded implants</b>                    | <b>Number (approx.)</b> |
|---------------------|-----------------------------------|--------------------------------------------------------------------------------------------------|---------------------------------------------|-------------------------|
| hip                 | 1st Jan. 2000 –<br>31st Dec. 2017 | total arthroplasty,                                                                              | special                                     | 175000                  |
|                     |                                   | hemiarthroplasty, resurfacing,<br>revision and removal operations                                | prostheses for<br>tumour surgery            |                         |
| knee                | 1st Jan. 2000 –<br>31st Dec. 2017 | uni-, bi- and tri-compartmental<br>arthroplasty, revision and<br>removal operations              | special<br>prostheses for<br>tumour surgery | 105000                  |
|                     |                                   |                                                                                                  |                                             |                         |
| shoulder            | 1st Jan. 2008 –<br>31st Dec. 2017 | anatomical and reverse<br>arthroplasty, resurfacing, partial,<br>revision and removal operations | special<br>prostheses for<br>tumour surgery | 6700                    |
|                     |                                   |                                                                                                  |                                             |                         |

**Table S2.** Features of the Italian regional healthcare systems databases *Assistenza Specialistica Ambulatoriale* (ASA) and *Scheda di Dimissione Ospedaliera* (SDO). Abbreviation: SSN, *Sistema Sanitario Nazionale* (Italian National Healthcare System).

| Clinical<br>services<br>database | Included patients services                                                                                                                                              | Excluded patients<br>services                          |
|----------------------------------|-------------------------------------------------------------------------------------------------------------------------------------------------------------------------|--------------------------------------------------------|
|                                  | <hr/>                                                                                                                                                                   |                                                        |
|                                  | Collects specialist outpatient assistance                                                                                                                               |                                                        |
| ASA                              | provided to individual patients by public<br>and private providers of the region<br>accredited by the SSN                                                               | Specialist assistance given<br>during hospital staying |
| SDO                              | Includes all the clinical services provided<br>to individual patients during hospital<br>staying by public and private hospitals of<br>the region accredited by the SSN |                                                        |
